# Supplementary material for: Hydroxytakakiamide and Other Constituents from a Marine Sponge-Associated Fungus Aspergillus fischeri MMERU23, and Antinociceptive Activity of Ergosterol Acetate, Acetylaszonalenin and Helvolic Acid
Source: MDPI journal article supplement (doi:10.3390/md22030097), 2024-02-20

## Supplementary Materials

### Hydroxytakakiamide and other Constituents from a Marine Sponge-Associated Fungus *Aspergillus fischeri* MMERU23, and Antinociceptive Activity of Ergosterol Acetate, Aszonalenin and Helvolic Acid

Harol Ricardo Arias Cardona<sup>1</sup>, Bruno Cerqueira da Silva<sup>1</sup>, Flávia Oliveira de Lima<sup>1</sup>, Franco Henrique Andrade Leite<sup>1</sup>, Bruno Cruz de Souza<sup>1</sup>, Hugo Neves Brandão<sup>1</sup>, Jorge Maurício David<sup>2</sup>, Clayton Queiroz Alves<sup>3\*</sup> and Anake Kijjoa<sup>4\*</sup>

<sup>1</sup> Departamento de Saúde, Universidade Estadual Feira de Santana, Av. Transnordestina, 3400-Papagaio, Feira de Santana, Bahia, Brazil; hrariasc@unal.edu.co (H.C.); farma.bruno@yahoo.com.br (B. Si.); flavia\_lima2000@yahoo.com.br (F. Li.); fhaleite@uefs.br (F. Le.); bcfarma@gmail.com (B. So.); hugo@uefs.br (H. B.)

<sup>2</sup> Instituto de Química, Universidade Federal da Bahia, Av. Milton Santos, s/nº-Ondina, Salvador, Bahia, 40170-110, Brazil; jmdavid@ufba.br (J. D.)

<sup>3</sup> Departamento de Ciências Exatas, Universidade Estadual Feira de Santana, Av. Transnordestina, 3400-Papagaio, Feira de Santana, Bahia, Brazil

<sup>4</sup> ICBAS-Instituto de Ciências Biomédicas Abel Salazar, Universidade do Porto, Rua de Jorge Viterbo Ferreira, 228, 4050-313 Porto, Portugal

\*Correspondence: ankijjoa@icbas.up.pt (A.K.); Tel. +351-962712474; cqalves@uefs.br (C. A.); Tel. +55-71-91334941

The image displays the chemical structures of two sterols:  $\beta$ -sitosterol and stigmasterol. Both molecules consist of a four-ring steroid nucleus with a hydroxyl group at C-3, a double bond at C-5, and methyl groups at C-10 and C-13. The side chain at C-17 is the primary point of difference:  $\beta$ -sitosterol has a saturated side chain ending in an ethyl group, while stigmasterol has an unsaturated side chain with a double bond between C-22 and C-23.

$\beta$ -sitosterol

stigmasterol

[illegible]

**Figure S3.**  $^{13}\text{C}$  NMR spectrum of ergosterol (**1**) ( $\text{CDCl}_3$ , 300 MHz).

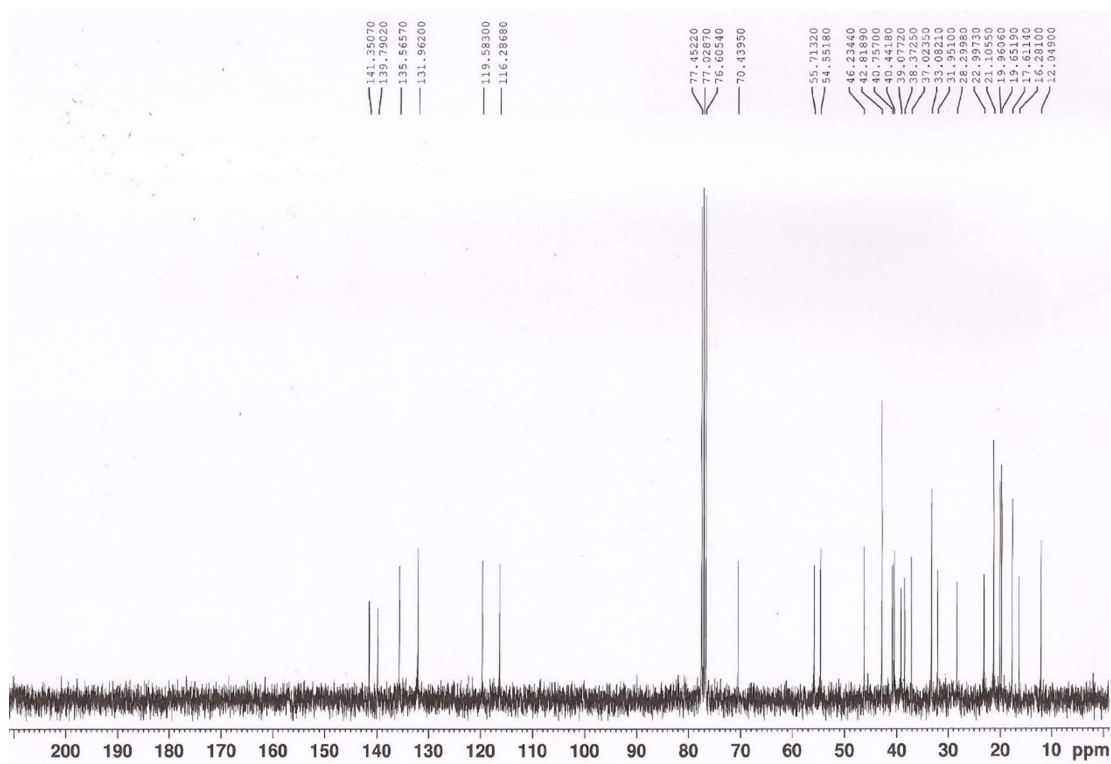

**Figure S4.**  $^1\text{H}$  NMR spectrum of ergosterol acetate (**2**) ( $\text{CDCl}_3$ , 300 MHz).

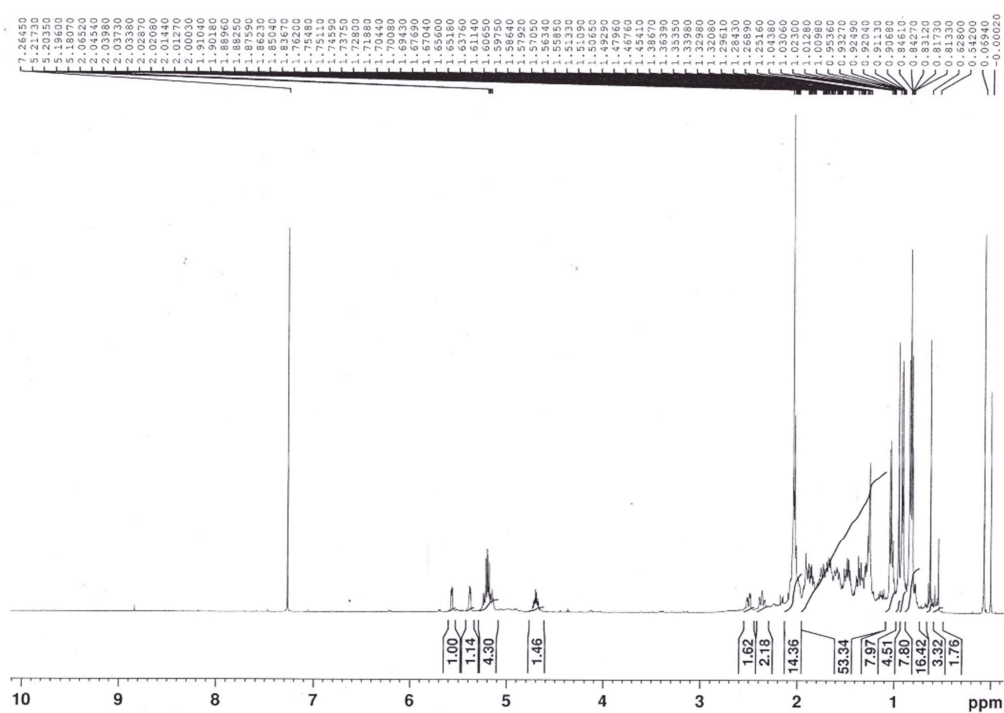

**Figure S5.**  $^{13}\text{C}$  NMR spectrum of ergosterol acetate (**2**) ( $\text{CDCl}_3$ , 300 MHz).

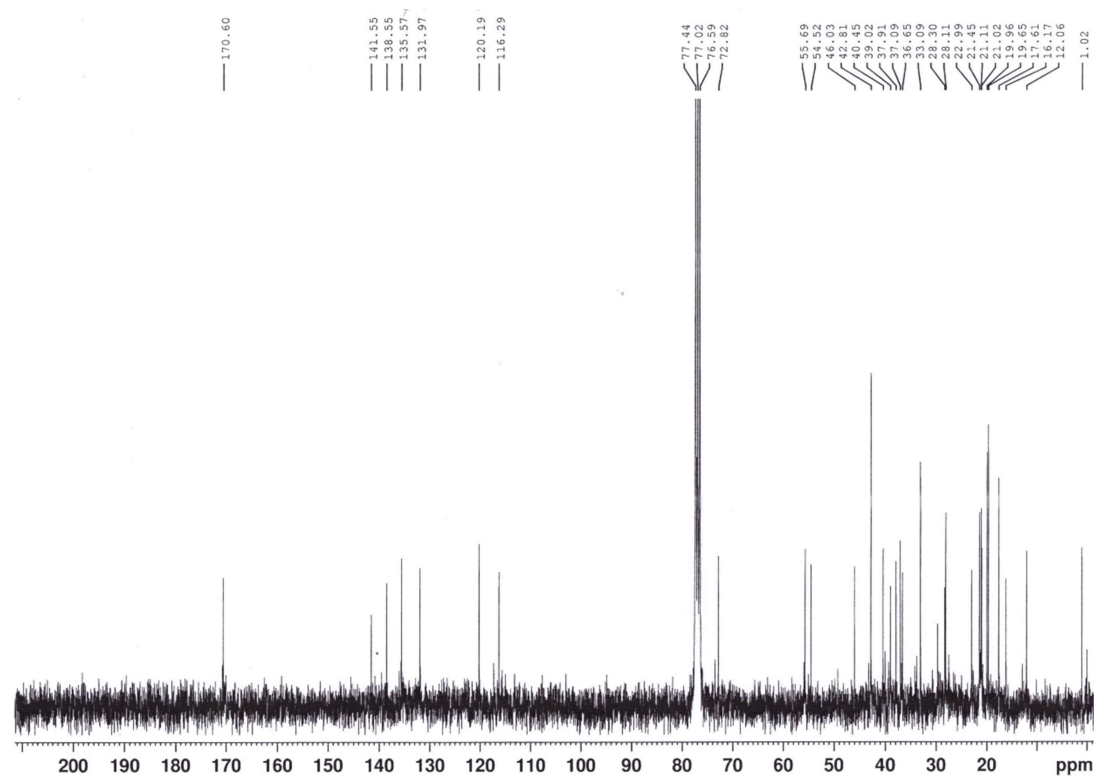

**Figure S6.**  $^1\text{H}$  NMR spectrum of (3*R*)-3-(1*H*-indol-3-ylmethyl)-3,4-dihydro-1*H*-1,4-benzodiazepine-2,5-dione (**3**) ( $\text{DMSO-d}_6$ , 500 MHz).

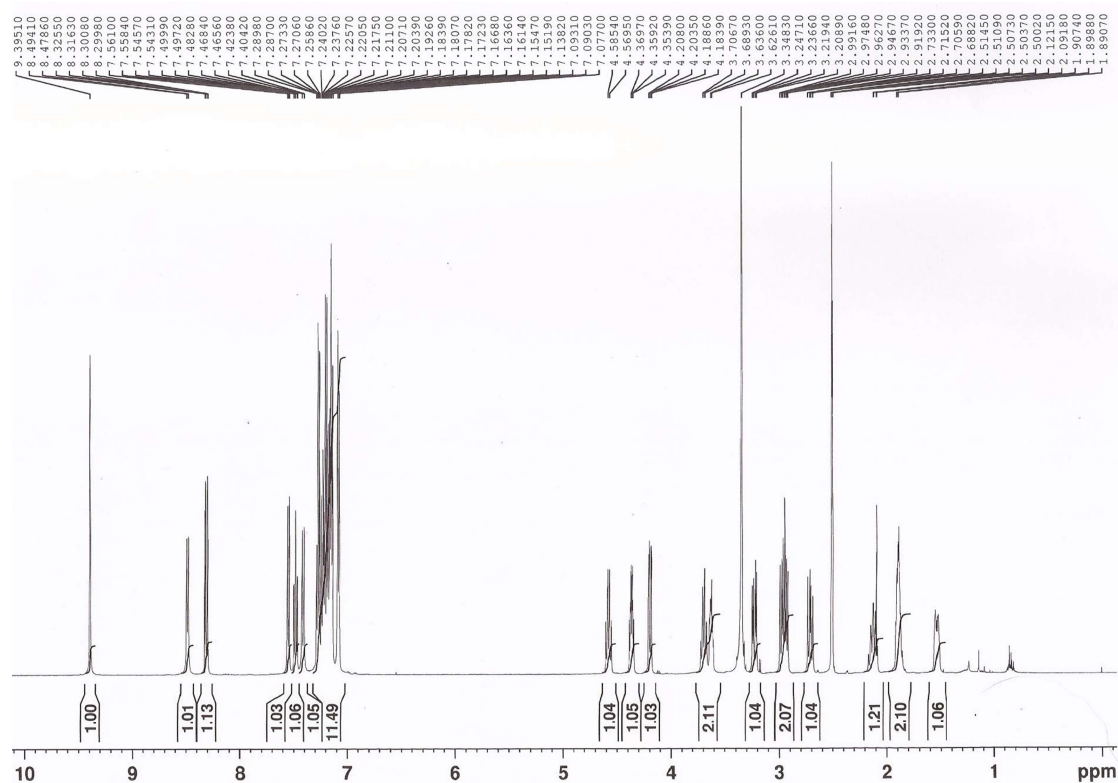

**Figure S7.**  $^{13}\text{C}$  NMR spectrum of (3*R*)-3-(1*H*-indol-3-ylmethyl)-3, 4-dihydro-1*H*-1,4-benzodiazepine-2,5-dione (**3**) ( $\text{DMSO-d}_6$ , 125 MHz)

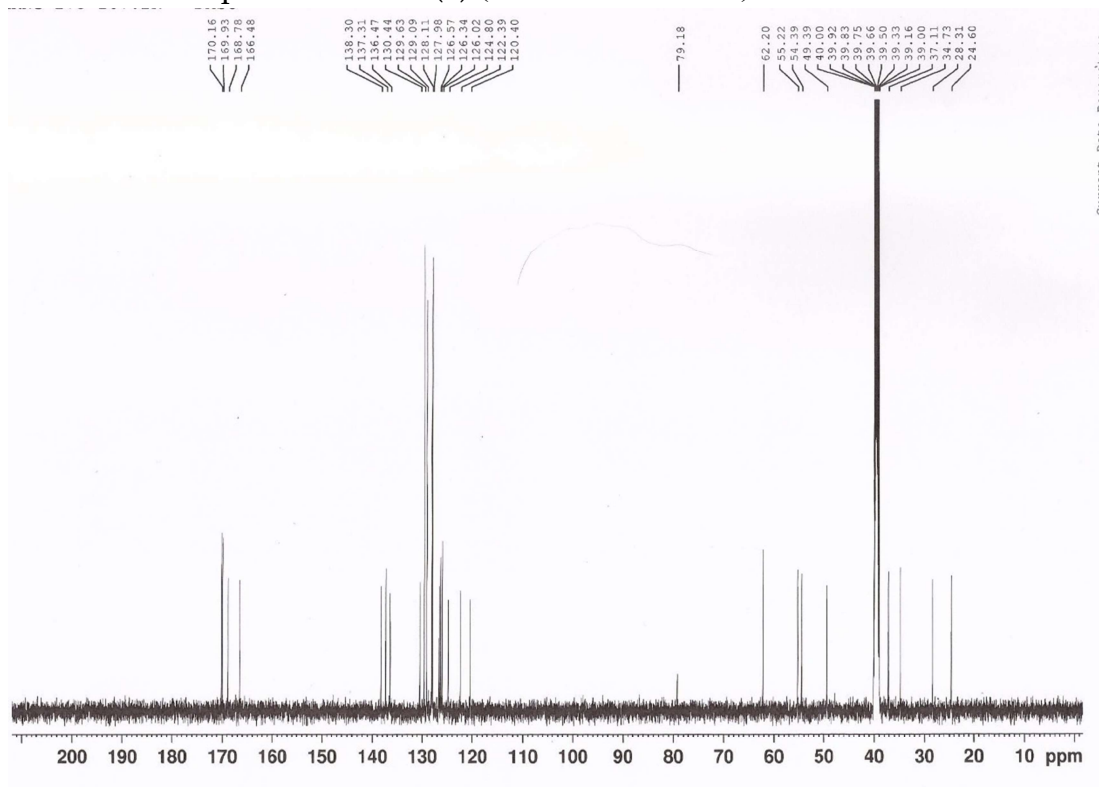

**Figure S8.**  $^1\text{H}$  NMR spectrum of hydroxytakakiamide (**4**) ( $\text{CDCl}_3$ , 500 MHz).

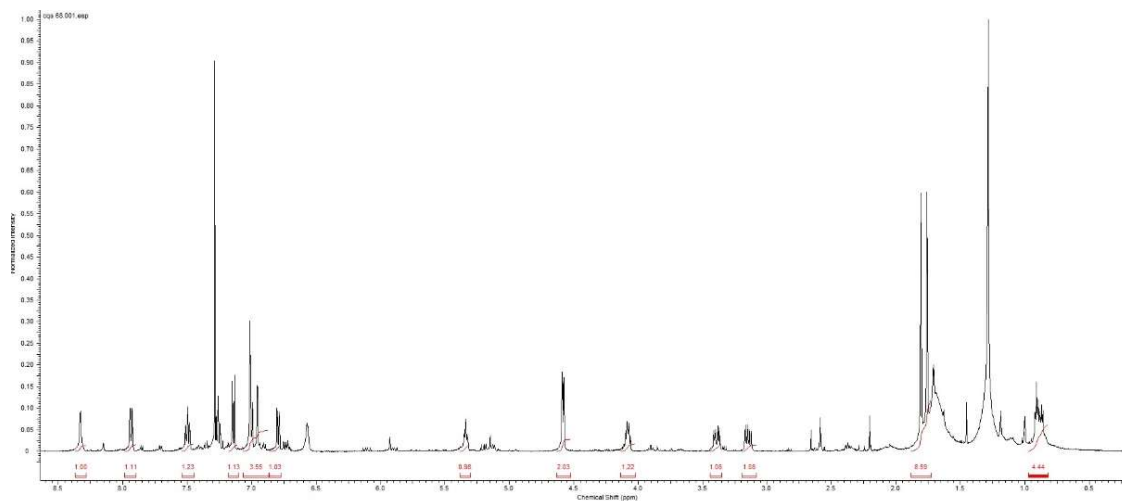

**Figure S9.**  $^{13}\text{C}$  NMR spectrum of hydroxytakakiamide (**4**) ( $\text{CDCl}_3$ , 125 MHz).

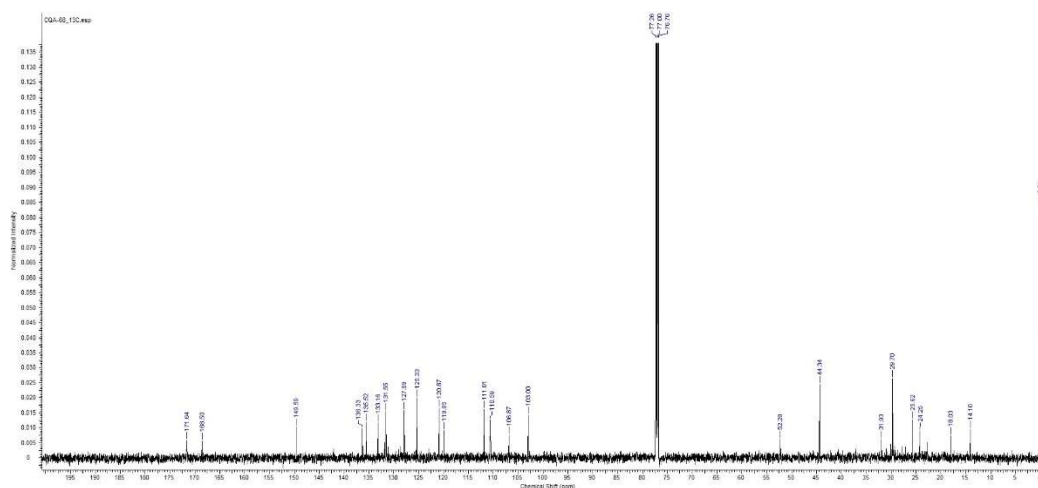

**Figure S10.** COSY spectrum of hydroxytakakiamide (**4**) ( $\text{CDCl}_3$ , 500 MHz).

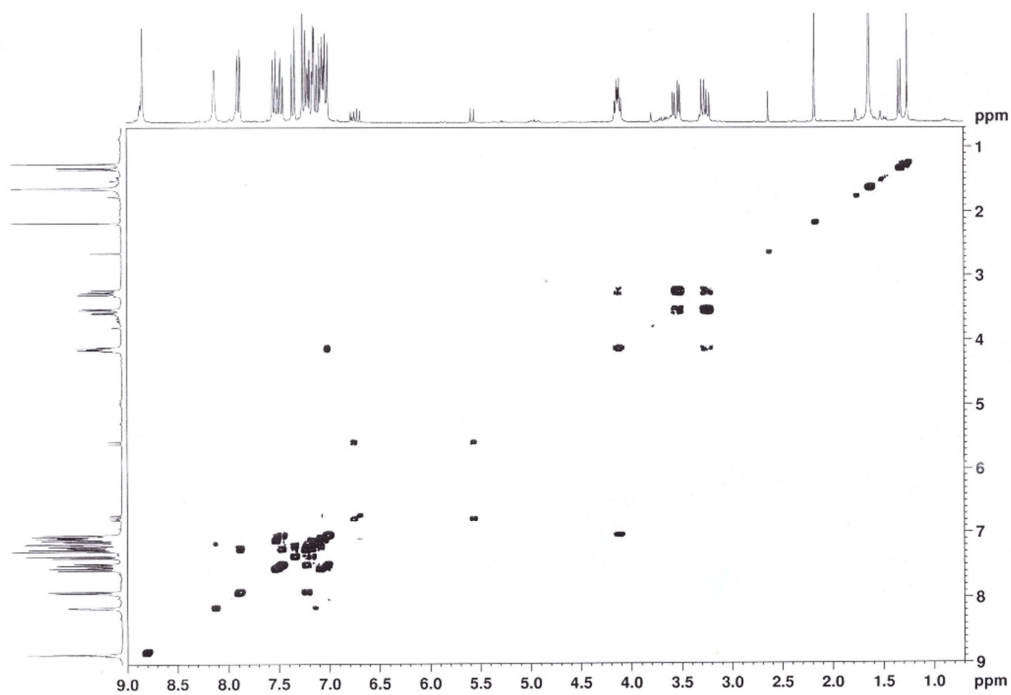

**Figure S11.** HSQC spectrum of hydroxytakakiamide (**4**) (CDCl<sub>3</sub>, 500 MHz).

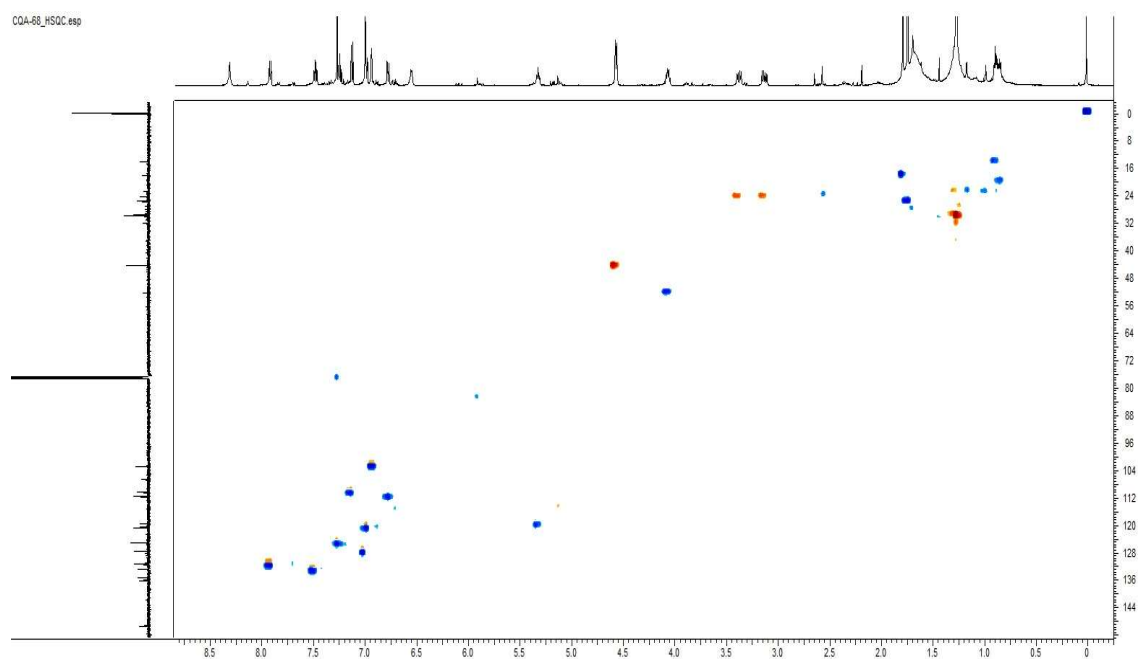

**Figure S12.** HMBC spectrum of hydroxytakakiamide (**4**) (CDCl<sub>3</sub>, 500 MHz).

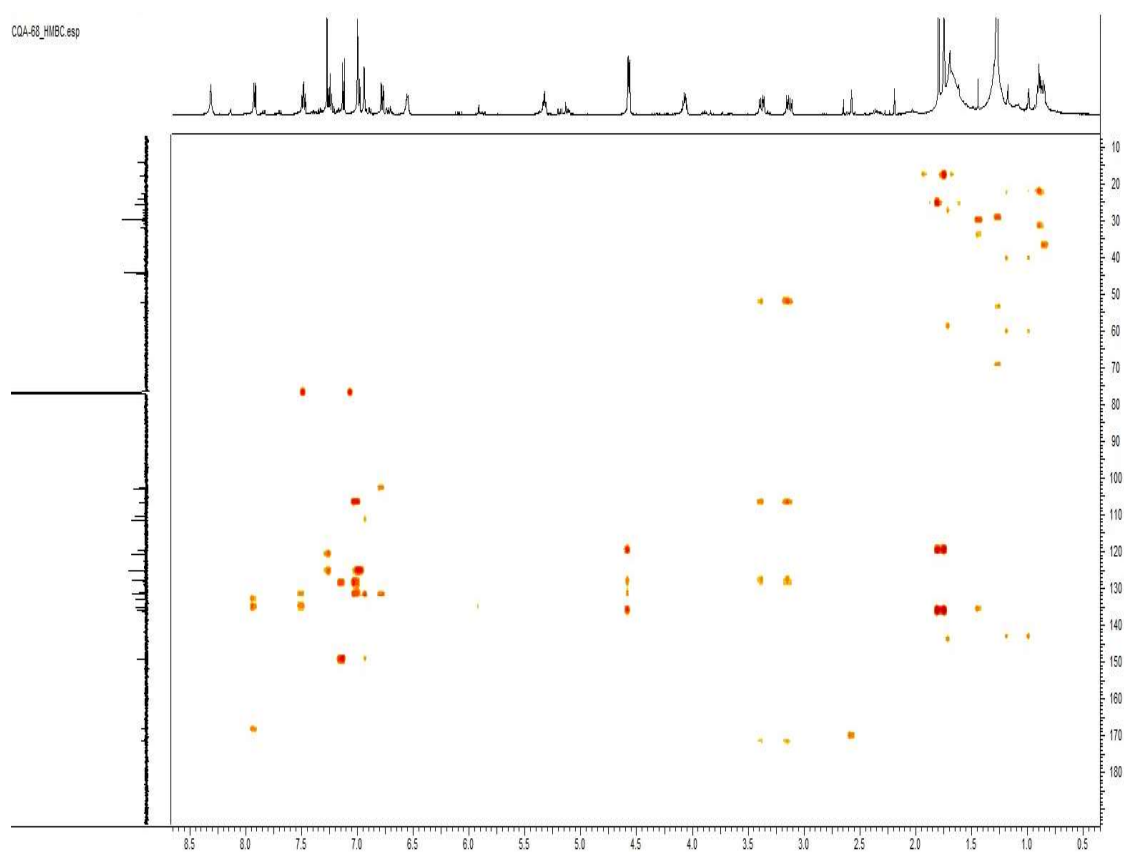

**Figure S13.** (-)-HRMS spectrum of hydroxytakakiamide (**4**)

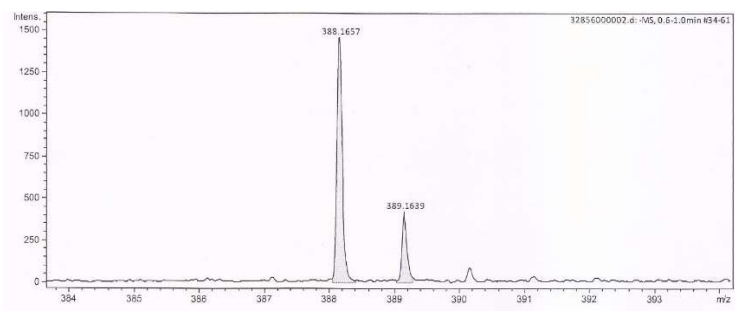

**Figure S14.**  $^1\text{H}$  NMR spectrum of helvolic acid (**5**) ( $\text{CDCl}_3$ , 300 MHz).

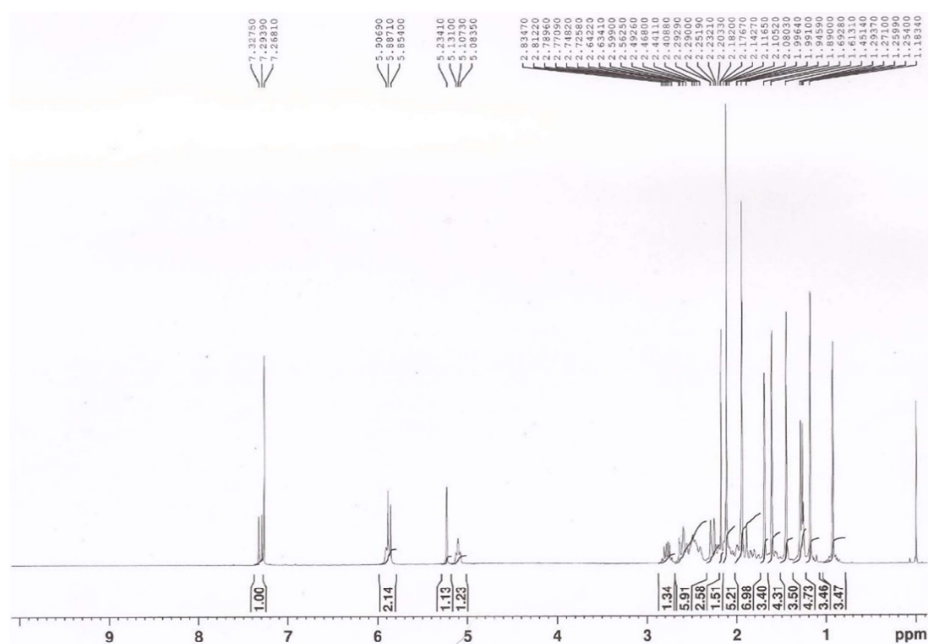

**Figure S15.**  $^{13}\text{C}$  NMR spectrum of helvolic acid (**5**) ( $\text{CDCl}_3$ , 75 MHz).

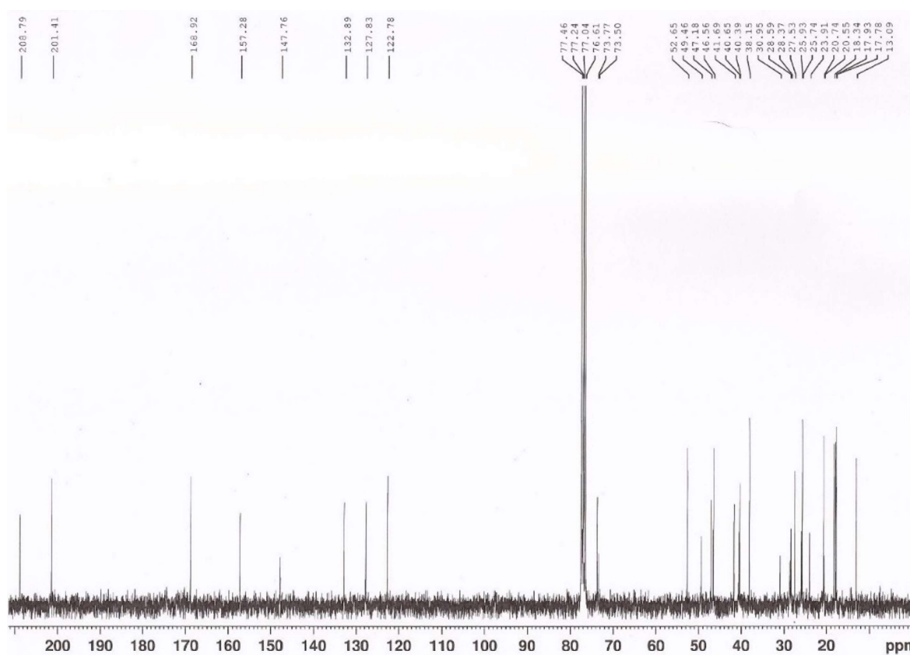

Supplement: s1 [file s1]
